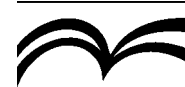

# The relationship between photosystem II efficiency and quantum yield for CO<sub>2</sub> assimilation is not affected by nitrogen content in apple leaves

Lailiang Cheng<sup>1,3</sup>, Leslie H. Fuchigami<sup>2</sup> and Patrick J. Breen<sup>2</sup>

<sup>1</sup> Department of Horticulture, 134A Plant Science Building, Cornell University, Ithaca, NY 14853-4203, USA

<sup>2</sup> Department of Horticulture, Oregon State University, Corvallis, OR 97331, USA

Received 5 February 2001; Accepted 30 May 2001

## Abstract

**Bench-grafted Fuji/M.26 apple (*Malus domestica* Borkh.) trees were fertigated with different concentrations of nitrogen by using a modified Hoagland's solution for 45 d. CO<sub>2</sub> assimilation and photosystem II (PSII) quantum efficiency in response to incident photon flux density (PFD) were measured simultaneously in recent fully expanded leaves under low O<sub>2</sub> (2%) and saturated CO<sub>2</sub> (1300 µmol mol<sup>-1</sup>) conditions. A single curvilinear relationship was found between true quantum yield for CO<sub>2</sub> assimilation and PSII quantum efficiency for leaves with a wide range of leaf N content. The relationship was linear up to a quantum yield of approximately 0.05 mol CO<sub>2</sub> mol<sup>-1</sup> quanta. It then became curvilinear with a further rise in quantum yield in response to decreasing PFD. This relationship was subsequently used as a calibration curve to assess the rate of non-cyclic electron transport associated with Rubisco and the partitioning of electron flow between CO<sub>2</sub> assimilation and photorespiration in different N leaves in response to intercellular CO<sub>2</sub> concentration (C<sub>i</sub>) under normal O<sub>2</sub> conditions. Both the rate of non-cyclic electron flow and the rate of electron flow to CO<sub>2</sub> or O<sub>2</sub> increased with increasing leaf N at any given C<sub>i</sub>. The percentage of non-cyclic electron flow to CO<sub>2</sub> assimilation, however, remained the same regardless of leaf N content. As C<sub>i</sub> increased, the percentage of non-cyclic electron flow to CO<sub>2</sub> assimilation increased. In conclusion, the relationship between PSII quantum efficiency and quantum yield for CO<sub>2</sub> assimilation and the partitioning of electron flow between CO<sub>2</sub> assimilation and photorespiration are not affected by N content in apple leaves.**

Key words: Apple, *Malus domestica*, CO<sub>2</sub> assimilation, electron partitioning, leaf N content, non-photochemical quenching, PSII efficiency, quantum yield.

## Introduction

Light-driven photosynthetic electron transport provides reducing power for photosynthetic carbon reduction and photorespiratory carbon oxidation. Both these processes are associated with the activity of ribulose 1,5-bisphosphate carboxylase/oxygenase (Rubisco). Electron transport may also provide a source for alternative electron sinks, such as nitrate reduction and direct reduction of O<sub>2</sub> in the Mehler reaction. Genty *et al.* first found a linear relationship between quantum yield for CO<sub>2</sub> assimilation and the product of photochemical quenching ( $qP$ ) and the efficiency of excitation capture ( $F_v'/F_m'$ ) by open photosystem II (PSII) centres under non-photorespiratory conditions (Genty *et al.*, 1989). This provides the basis for using  $qP \times F_v'/F_m'$  (PSII quantum efficiency) to monitor changes in quantum yield of non-cyclic electron transport *in vivo*. The quantitative relationship between PSII quantum efficiency and quantum yield for CO<sub>2</sub> assimilation, developed under non-photorespiratory conditions, has subsequently been used as a calibration curve to estimate the rate of non-cyclic electron transport associated with Rubisco and partitioning of electron flow between CO<sub>2</sub> assimilation and photorespiration under photorespiratory conditions (Cornic and Briantais, 1991; Cornic and Ghashghaie, 1991; Ghashghaie and Cornic, 1994; Habash *et al.*, 1995).

The relationship between PSII quantum efficiency and quantum yield for CO<sub>2</sub> assimilation or O<sub>2</sub> evolution

<sup>3</sup>To whom correspondence should be addressed. Fax: +1 607 255 0599. E-mail: LC89@Cornell.edu

has been well documented. Linear relationships have been reported in many species (Cornic and Briantais, 1991; Cornic and Ghashghaie, 1991; Genty *et al.*, 1989, 1992; Ghashghaie and Cornic, 1994; Harbinson *et al.*, 1990; Keiller and Walker, 1990; Krall and Edwards, 1990, 1991; Krall *et al.*, 1991; Maxwell *et al.*, 1998). However, the relationship became non-linear in the high quantum yield region or at low measuring PFD (Öquist and Chow, 1992; Seaton and Walker, 1990). It appears that the relationship between PSII quantum efficiency and quantum yield for CO<sub>2</sub> assimilation is conserved as it holds across species (Seaton and Walker, 1990) and is not affected by water stress or elevated CO<sub>2</sub> (Cornic and Ghashghaie, 1991; Habash *et al.*, 1995).

The effect of leaf N on the relationship between PSII quantum efficiency and quantum yield for CO<sub>2</sub> assimilation has not been closely examined. Khamis *et al.* noted a small decrease in quantum yield for CO<sub>2</sub> assimilation at any given PSII efficiency in maize (*Zea mays* L.) leaves under low N supply (Khamis *et al.*, 1990). The decrease in light absorption caused by N limitation, however, may not have been taken into account. Both *in vivo* Rubisco activity and PSII quantum efficiency are closely co-ordinated in apple (*Malus domestica* Borkh.) leaves in response to nitrogen supply. Although total Rubisco activity increased with increasing leaf N, Rubisco activation state decreased so that only a proportion of the total Rubisco was engaged in photosynthesis in high N leaves (Cheng and Fuchigami, 2000). Under high PFD conditions, the PSII quantum efficiency of apple leaves was down-regulated by increased thermal dissipation in response to decreasing leaf N, to match Rubisco activity (Cheng *et al.*, 2000). However, it remains unclear how leaf N affects the rate of electron flow associated with Rubisco and its partitioning between CO<sub>2</sub> assimilation and photorespiration in apple leaves.

The objectives of this study were to (1) determine the relationship between PSII quantum efficiency and quantum yield for CO<sub>2</sub> assimilation in response to leaf N under non-photorespiratory conditions; and (2) assess the partitioning of non-cyclic electron flow between CO<sub>2</sub> assimilation and photorespiration in relation to N in apple leaves.

## Materials and methods

### Plant material

'Fuji' apple (*Malus domestica* Borkh.) trees on M.26 rootstocks were used. Bench-grafting was done in late March, and each grafted tree was immediately put into a 3.8 l pot containing a mixture of peat moss, pumice and sandy loam soil (1 : 2 : 1, by vol.). The plants were grown in a lathhouse until early June. During this period, beginning from budbreak in early May, they were fertigated every 2 weeks with 10.7 mM N using Plantex<sup>®</sup> 20 N-10 P<sub>2</sub>O<sub>5</sub>-20 K<sub>2</sub>O with micronutrients (Plantex Corp., Ontario, Canada). When new shoots were approximately

15 cm long, plants were selected for uniformity, and moved out to full sunlight. Thereafter, they were fertigated weekly with Plantex<sup>®</sup> for 3 weeks. Beginning 30 June, plants were fertigated twice weekly with one of six levels of N concentrations (0, 2.5, 5, 7.5, 10, or 15 mM N from NH<sub>4</sub>NO<sub>3</sub>) by applying 300 ml of a modified Hoagland's solution to each pot (Cheng and Fuchigami, 2000). Irrigation was provided from a saucer placed at the bottom of each pot. After 45 d, recent fully expanded leaves at the same developmental stage across the treatments were selected for gas exchange and chlorophyll fluorescence measurements.

### Measurements of gas exchange and chlorophyll fluorescence

CO<sub>2</sub> assimilation and chlorophyll fluorescence were measured simultaneously using a system that combined a CIRAS-1 gas exchange system (PP Systems, Herts., UK) and an FMS-1 pulse-modulated fluorometer (Hansatech Instruments Ltd., Norfolk, UK). The light- and temperature-controlled cuvette of the CIRAS-1 system was modified as follows: the fibre optic of the FMS-1 was inserted into the cuvette at a 60° angle without significantly interfering with PFD distribution at the leaf surface, yet it allowed for delivery of a saturation pulse of actinic light and detection of fluorescence signals. All gas exchange measurements were made at a leaf temperature of 25 ± 0.2 °C.

The relationship between quantum yield for CO<sub>2</sub> assimilation and PSII quantum efficiency was studied by altering incident PFD. Measurements of CO<sub>2</sub> assimilation and chlorophyll fluorescence parameters in response to PFD were made in descending order, at incident PFDs of 1990, 1614, 1242, 891, 593, 398, 255, 160, or 87 μmol m<sup>-2</sup> s<sup>-1</sup> at the leaf surface level, as measured with a recently calibrated LI-190SA quantum sensor (Li-Cor Inc., Lincoln, Nebraska, USA). At each PFD, CO<sub>2</sub> assimilation, stomatal conductance, and steady-state fluorescence ( $F_s$ ) were monitored to ensure that they reached a steady-state before a reading was taken. Maximal fluorescence under light exposure ( $F'_m$ ) was obtained by imposing a 1 s saturating flash to the leaf in order to reduce all the PSII centres. Minimal fluorescence ( $F'_0$ ) under light exposure was determined by covering the cuvette with a black cloth while a far-red light was switched on to oxidize PSII rapidly by drawing electrons from PSII to PSI. Maximal fluorescence ( $F_m$ ) and minimal fluorescence ( $F_0$ ) of dark-adapted leaves were measured pre-dawn.

Non-photochemical quenching (NPQ) was expressed as  $F_m/F'_m - 1$  (Stern-Volmer quenching; see Bilger and Björkman, 1990). The efficiency of excitation capture by open PSII centres ( $F'_v/F'_m$ ) was calculated as  $(F'_m - F'_0)/F'_m$ , which is also referred to as the efficiency with which excitation energy is transferred to open PSII centres. The photochemical quenching coefficient  $qP$  was defined as  $(F'_m - F_s)/(F'_m - F'_0)$ . PSII quantum efficiency was  $(F'_v/F'_m)qP = (F'_m - F_s)/F'_m$  (Genty *et al.*, 1989). Quantum yield for CO<sub>2</sub> assimilation was calculated as gross CO<sub>2</sub> assimilation ( $A + R_d$ ) divided by either incident PFD or absorbed PFD.  $R_d$  was day respiration under light from processes other than photorespiration, which was approximated as dark respiration for this experiment. Leaf absorptance was measured with a LI-1800 Spectroradiometer and an 1800-12S Integrating Sphere (Cheng *et al.*, 2000).

Partitioning of non-cyclic electron flow between CO<sub>2</sub> assimilation and photorespiration in leaves with different N contents was studied by measuring responses of CO<sub>2</sub> assimilation and PSII quantum efficiency to intercellular CO<sub>2</sub> concentrations ( $C_i$ ) at normal O<sub>2</sub> (21%) conditions. Response curves of CO<sub>2</sub> assimilation and PSII quantum efficiency to  $C_i$  were constructed at an incident PFD of 1000 μmol m<sup>-2</sup> s<sup>-1</sup> by

altering air  $\text{CO}_2$  concentrations ( $C_a$ ) from 50 to 1200 ~ 1400  $\mu\text{mol mol}^{-1}$  in 9 or 10 steps, until the highest  $C_i$  reached approximately 1000  $\mu\text{mol mol}^{-1}$ . At each  $C_a$ , readings of  $\text{CO}_2$  assimilation, stomatal conductance, and steady-state fluorescence were taken after they all reached steady state. PSII quantum efficiency was measured as described above.

The rate of non-cyclic electron transport associated with Rubisco and its partitioning to  $\text{CO}_2$  assimilation and photorespiration were calculated (Ghashghaie and Cornic, 1994). Briefly, the quantitative relationship between quantum yield for  $\text{CO}_2$  assimilation and PSII quantum efficiency, developed under non-photorespiratory conditions, was used as a calibration curve. Quantum yield for  $\text{CO}_2$  assimilation ( $\Phi_{\text{CO}_2}$ ) obtained from the calibration curve corresponding to the PSII quantum efficiency measured under photorespiratory conditions allows the rate of non-cyclic electron flow ( $J_L$ ) to be calculated as  $J_L = \Phi_{\text{CO}_2} \times \text{PFD} \times 4$ . The rate of electron flow to  $\text{CO}_2$  assimilation ( $J_A$ ) and to photorespiration ( $J_o$ ) were calculated as  $J_A = 4(A + R_d)$ , and  $J_o = J_L - J_A$ , respectively.

#### Leaf N content

After all the above measurements, leaf area was determined with a LI-3000 Area Meter. Leaves were frozen at  $-80^\circ\text{C}$ , then freeze-dried. N content was determined via the Kjeldahl method (Schuman *et al.*, 1973).

## Results

### The relationship between quantum yield for $\text{CO}_2$ assimilation and PSII quantum efficiency under non-photorespiratory conditions

As PFD increased,  $\text{CO}_2$  assimilation increased almost linearly first, then reached a saturation point (Fig. 1A), beyond which  $\text{CO}_2$  assimilation showed little response to increasing PFD. Both true quantum yield for  $\text{CO}_2$  assimilation (Fig. 1B) and PSII quantum efficiency (Fig. 1C) decreased with increasing PFD. At each given PFD,  $\text{CO}_2$  assimilation, true quantum yield for  $\text{CO}_2$  assimilation, and PSII quantum efficiency all decreased as leaf N decreased.

Chlorophyll fluorescence quenching parameters in response to incident PFD are shown in Fig. 2. As PFD increased, non-photochemical quenching (NPQ) increased, then tended to level off with further increases in PFD (Fig. 2A). Correspondingly, the efficiency of excitation capture by open PSII centres ( $F_v'/F_m'$ ) decreased with increasing PFD (Fig. 2B). The photochemical quenching coefficient ( $qP$ ) also decreased with increasing PFD (Fig. 2C). At each given PFD, NPQ increased with decreasing leaf N (Fig. 2A), resulting in a corresponding decline in  $F_v'/F_m'$  (Fig. 2B);  $qP$  also decreased with decreasing leaf N content (Fig. 2C). The decline in both  $F_v'/F_m'$  and  $qP$  in response to increasing PFD led to the fall in PSII quantum efficiency (Fig. 1C). At each given PFD, the decrease in both  $F_v'/F_m'$  and  $qP$  also contributed to a decline in PSII quantum efficiency with decreasing leaf N content (Fig. 1C).

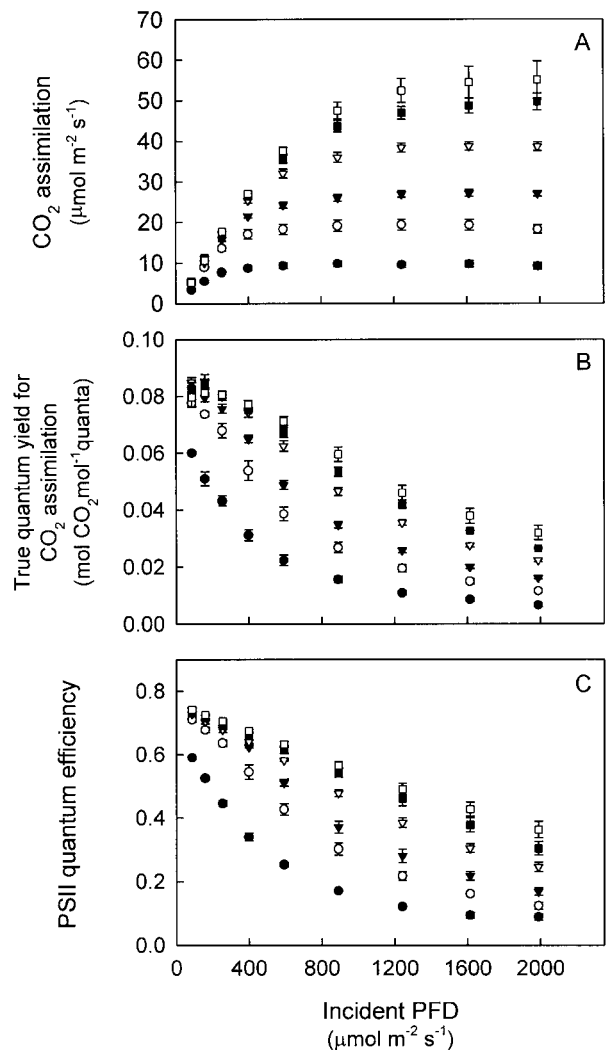

**Fig. 1.**  $\text{CO}_2$  assimilation (A), true quantum yield for  $\text{CO}_2$  assimilation (B), and PSII quantum efficiency (C) of apple leaves in response to incident photon flux density (PFD) under low  $\text{O}_2$  (2%) and saturated  $\text{CO}_2$  (1300  $\mu\text{mol mol}^{-1}$ ) conditions. Measurements were made at leaf temperature of  $25 \pm 0.2^\circ\text{C}$  and ambient water vapour pressure of  $1.37 \pm 0.15$  kPa. Each data point represents the average of three replications with standard error. Leaf N content ( $\text{g m}^{-2}$ ) is:  $1.022 \pm 0.077$  (●);  $1.566 \pm 0.065$  (○);  $1.802 \pm 0.10$  (▼);  $2.361 \pm 0.031$  (▽);  $3.227 \pm 0.011$  (■); and  $4.044 \pm 0.207$  (□).

When each fluorescence parameter ( $\text{NPQ}$ ,  $F_v'/F_m'$ , and  $qP$ ) was plotted against the true quantum yield for  $\text{CO}_2$  assimilation (Fig. 3), curvilinear relationships to true quantum yield for  $\text{CO}_2$  assimilation were found for  $\text{NPQ}$ ,  $F_v'/F_m'$ , and  $qP$  (Fig. 3A, B, C, respectively). In response to rising PFD or decreasing leaf N,  $\text{NPQ}$  increased. This resulted in a decrease in  $F_v'/F_m'$ . A decline in  $qP$  also contributed to the lowering of quantum yield for  $\text{CO}_2$  assimilation in response to rising PFD or decreasing leaf N.

A close relationship was found between quantum yield for  $\text{CO}_2$  assimilation and PSII quantum efficiency (Fig. 4). At any given PSII efficiency, low N leaves had

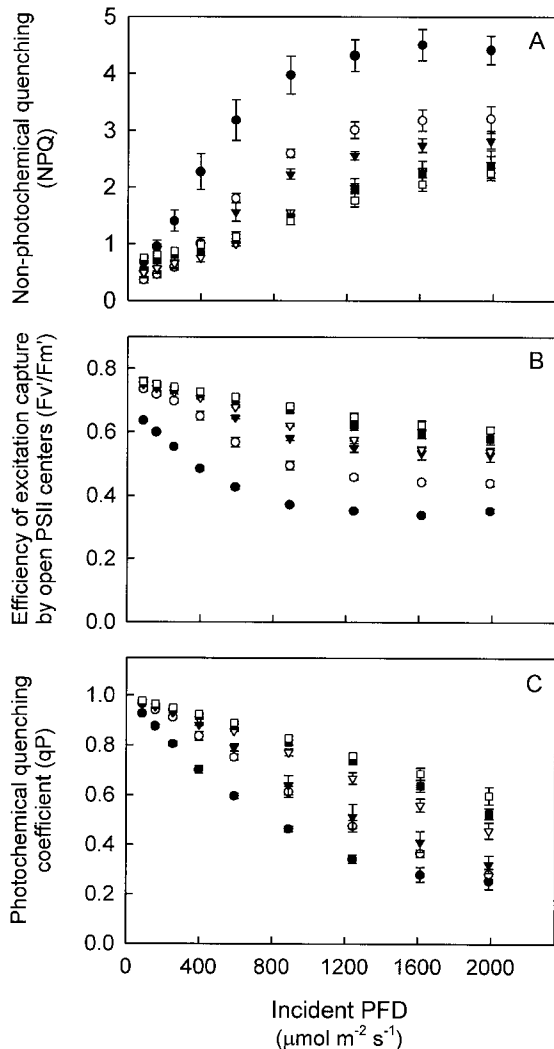

**Fig. 2.** Non-photochemical quenching (A), efficiency of excitation capture by open PSII centres (B), and photochemical quenching (C) of apple leaves in response to incident photon flux density (PFD) under low O<sub>2</sub> (2%) and saturated CO<sub>2</sub> (1300 μmol mol<sup>-1</sup>) conditions. Measurement conditions and symbols are the same as in Fig. 1.

a slightly lower apparent quantum yield for CO<sub>2</sub> assimilation (Fig. 4A). However, when quantum yield was expressed on an absorbed PFD basis (i.e. true quantum yield), all the data points from leaves with different N contents nearly fell into a single line (Fig. 4B). The relationship was linear up to a true quantum yield of approximately 0.05 mol CO<sub>2</sub> mol<sup>-1</sup> quanta. It then became curvilinear with a further rise in quantum yield in response to decreasing PFD.

*Partitioning of electron flow to CO<sub>2</sub> assimilation and photorespiration in response to intercellular CO<sub>2</sub> concentration (C<sub>i</sub>)*

As C<sub>i</sub> increased, CO<sub>2</sub> assimilation increased linearly first, then reached a plateau (Fig. 5A). Both the initial slope

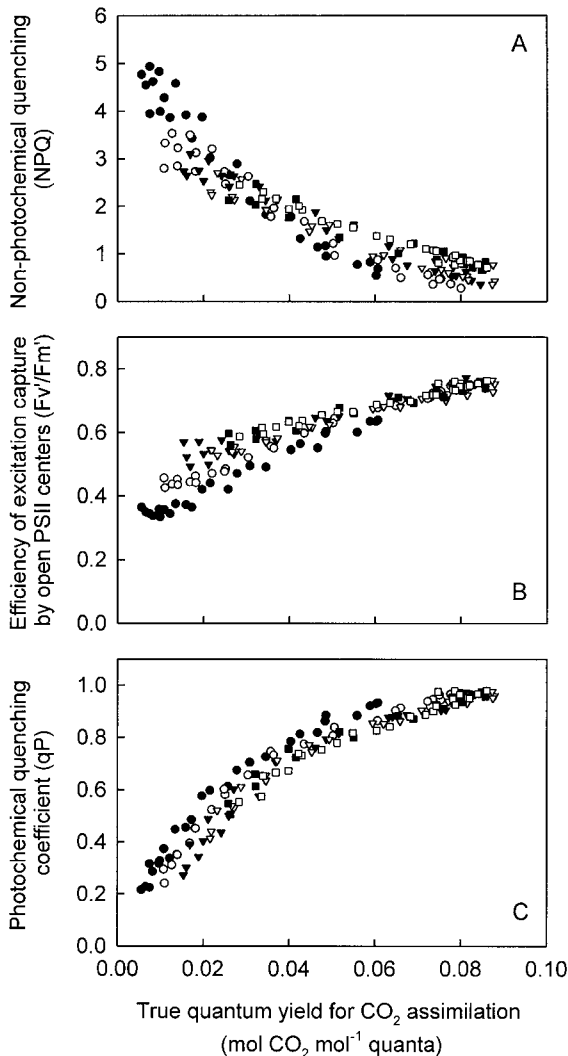

**Fig. 3.** True quantum yield for CO<sub>2</sub> assimilation in relation to chlorophyll fluorescence quenching parameters in apple leaves under low O<sub>2</sub> (2%) and saturated CO<sub>2</sub> (1300 μmol mol<sup>-1</sup>) conditions. (A) Non-photochemical quenching (NPQ); (B) efficiency of excitation capture by open PSII centres ( $F_v'/F_m'$ ); and (C) photochemical quenching coefficient ( $qP$ ). Symbols are the same as in Fig. 1 except that each data point represents a single measurement.

and the maximum CO<sub>2</sub> assimilation increased with increasing leaf N. PSII quantum efficiency showed a response to C<sub>i</sub> similar to that of CO<sub>2</sub> assimilation, but reached a plateau at a lower C<sub>i</sub> (Fig. 5B). This was most obvious for high N leaves. Using the curve in Fig. 4B, it was possible to estimate the rate of non-cyclic electron transport associated with Rubisco under photorespiratory conditions. Non-cyclic electron transport followed almost the same pattern as PSII quantum efficiency in response to C<sub>i</sub>. At any given C<sub>i</sub>, non-cyclic electron transport increased with increasing leaf N (Fig. 5C).

Non-cyclic electron flow to CO<sub>2</sub> showed the same response to C<sub>i</sub> as had CO<sub>2</sub> assimilation (Fig. 6A). As C<sub>i</sub> increased, electron flow to CO<sub>2</sub> increased almost linearly

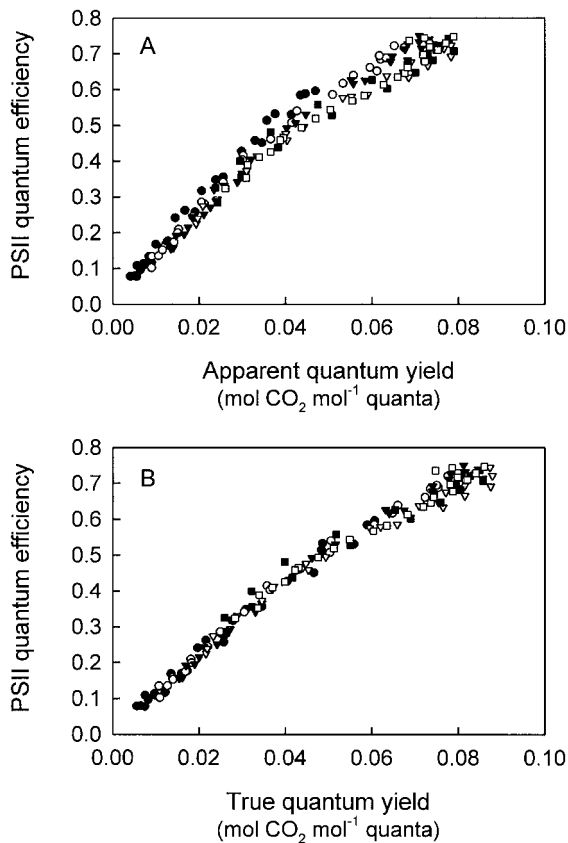

**Fig. 4.** PSII quantum efficiency in relation to apparent quantum yield (A) and true quantum yield (B) for CO<sub>2</sub> assimilation in apple leaves under low O<sub>2</sub> (2%) and saturated CO<sub>2</sub> (1300 μmol mol<sup>-1</sup>) conditions. Symbols are the same as in Fig. 1 except that each data point represents a single measurement.

first, then levelled off with a further rise in  $C_i$ . At any given  $C_i$ , electron flow to CO<sub>2</sub> was higher in high-N than in low-N leaves, although the difference was smaller at lower than at higher  $C_i$  (Fig. 6A). Non-cyclic electron flow to O<sub>2</sub> generally decreased as  $C_i$  increased (Fig. 6B). The difference in electron flow to O<sub>2</sub> at different N contents was larger at lower than at higher  $C_i$ . As  $C_i$  dropped below about 100 μmol mol<sup>-1</sup>, a decrease in non-cyclic electron flow to O<sub>2</sub> was noticed in medium to high-N leaves, but not in low-N leaves (Fig. 6B). When the electron flow to CO<sub>2</sub> was expressed as a percentage of non-cyclic electron flow, all data for leaves with different N contents nearly fell on one curve (Fig. 6C). As  $C_i$  increased, an increasing proportion of the non-cyclic electron flow was partitioned to CO<sub>2</sub> assimilation.

## Discussion

Photosynthetic electron transport drives both Rubisco-associated CO<sub>2</sub> assimilation and photorespiration, and also supplies electrons to other alternative electron sinks. A single curvilinear relationship was found between true quantum yield for CO<sub>2</sub> assimilation and PSII quantum

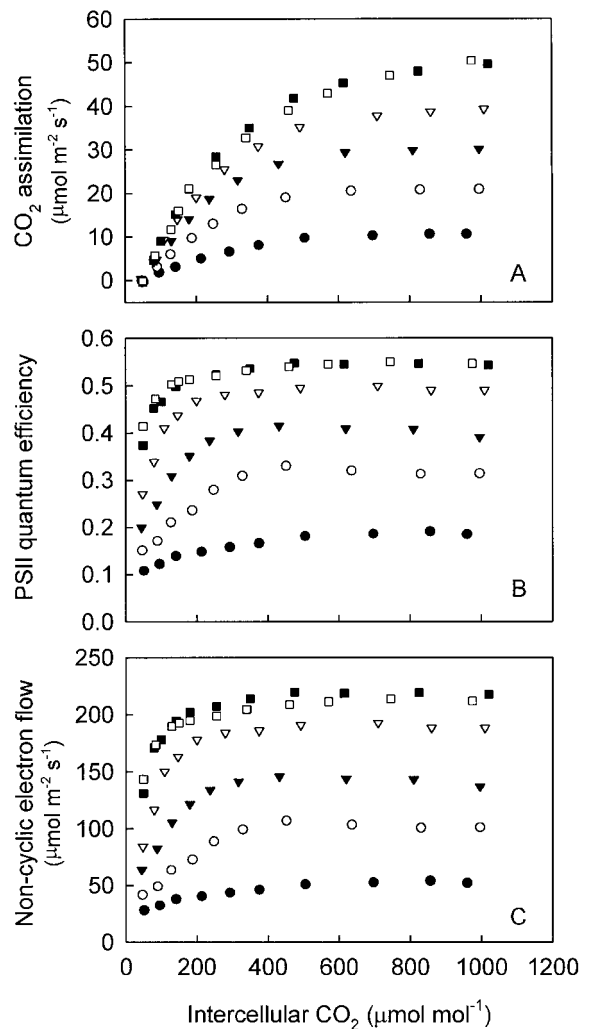

**Fig. 5.** CO<sub>2</sub> assimilation (A), PSII quantum efficiency (B), and total non-cyclic electron transport (C) of apple leaves in response to intercellular CO<sub>2</sub> concentration at 21% O<sub>2</sub>. Measurements were made at incident PFD of 1000 μmol m<sup>-2</sup> s<sup>-1</sup>, leaf temperature of 25 ± 0.2 °C, and ambient water vapour pressure of 1.45 ± 0.1 kPa. Leaf N content (g m<sup>-2</sup>) is: 1.10 (●); 1.53 (○); 1.99 (▼); 2.32 (▽); 3.22 (■); and 3.81 (□).

efficiency in apple leaves with different N contents under non-photorespiratory conditions (Fig. 4B). Based on this relationship, partitioning of non-cyclic electron flow between CO<sub>2</sub> assimilation and photorespiration was examined in response to  $C_i$ , as affected by leaf N. At any given  $C_i$ , the percentage of total non-cyclic electron flow to CO<sub>2</sub> assimilation remained unchanged regardless of leaf N content (Fig. 6C). Therefore, the relationship between PSII quantum efficiency and quantum yield for CO<sub>2</sub> assimilation under non-photorespiratory conditions, and the partitioning of non-cyclic electron flow between CO<sub>2</sub> assimilation and photorespiration at normal O<sub>2</sub> conditions, are not affected by N content in apple leaves.

The slope of the relationship between quantum yield for CO<sub>2</sub> assimilation and PSII quantum efficiency depends on the partitioning of non-cyclic electron flow

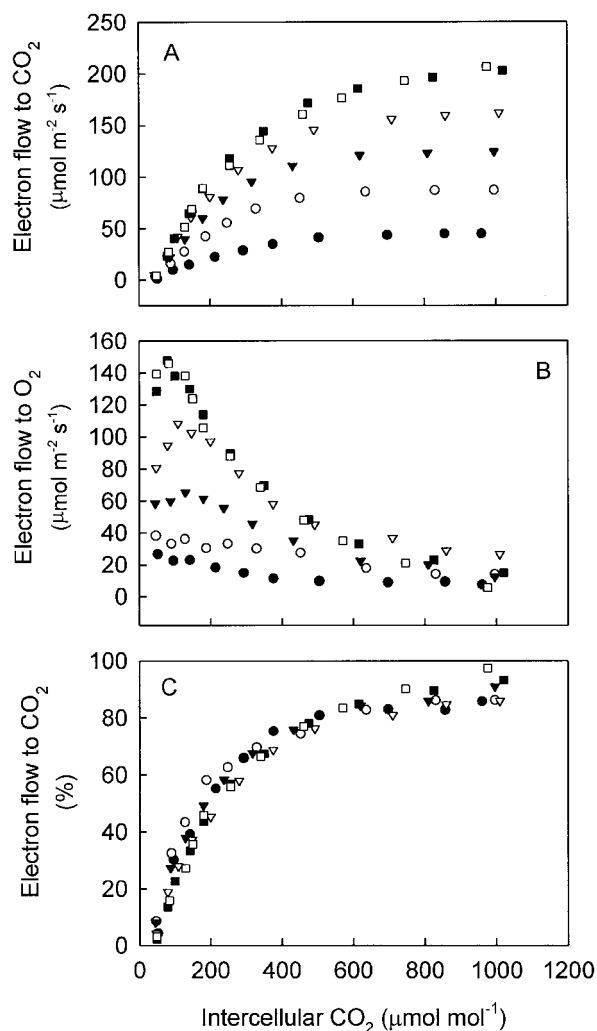

**Fig. 6.** Partitioning of total non-cyclic electron flow to CO<sub>2</sub> assimilation and photorespiration of apple leaves in response to intercellular CO<sub>2</sub> concentration at 21% O<sub>2</sub>: electron flow to CO<sub>2</sub> (A); electron flow to O<sub>2</sub> (B); and percentage of electron flow to CO<sub>2</sub> (C). Measurement conditions and symbols are the same as in Fig. 5.

between CO<sub>2</sub> assimilation and other alternative electron sinks under non-photorespiratory conditions. At any given PSII efficiency, if other electron sinks use more reducing power, the quantum yield for CO<sub>2</sub> assimilation would be reduced.

Among the alternative electron sinks, nitrate reduction can consume up to 8% of the total non-cyclic electron flow (Evans, 1987). In addition to serving as a substrate in photorespiration, O<sub>2</sub> also functions as an electron acceptor in the Mehler reaction (Badger, 1985). Although nitrate reduction primarily occurs in the root system of apple trees, nitrate reductase activity has been detected in leaves as the nitrate supply increases (Lee and Titus, 1992). This altered proportion of nitrate reduction in apple leaves in response to N supply, or a possible increase of the Mehler reaction in low N leaves under high light, could change the slope of the relationship.

However, in this study, a single curvilinear relationship was found between PSII quantum efficiency and true quantum yield for CO<sub>2</sub> assimilation in apple leaves with different N contents. This indicates that leaf N content does not affect the partitioning of non-cyclic electron flow to CO<sub>2</sub> assimilation relative to alternative electron sinks under non-photorespiratory conditions. The observed decrease in apparent quantum yield for CO<sub>2</sub> assimilation at any given PSII efficiency was mainly caused by failing to account for the decrease in light absorption in low N leaves.

The curvilinear relationship found between quantum yield for CO<sub>2</sub> assimilation and PSII quantum efficiency in this study is similar to that noted earlier (Seaton and Walker, 1990; Öquist and Chow, 1992). The exact cause for this non-linearity is unclear, but several factors may contribute. These include PSII heterogeneity (Hormann *et al.*, 1994; Schreiber *et al.*, 1995), changes in electron cycling around PSII and partitioning of non-cyclic electron flow to processes other than CO<sub>2</sub> assimilation (Genty *et al.*, 1989), and approximation of day respiration with dark respiration (Oberhuber *et al.*, 1993). In addition, non-linearity could occur if chlorophyll fluorescence and gas exchange measurements were monitoring different populations of leaf cells.

In this study the effects of non-photochemical and photochemical quenching on quantum yield for CO<sub>2</sub> assimilation were clearly seen. Increased NPQ in response to increasing incident PFD or decreasing leaf N caused a decline in quantum yield for CO<sub>2</sub> assimilation by decreasing the efficiency with which excitation energy was transferred to open PSII centres (Figs 2A, B, 3A, B). At high PFD, especially in low-N leaves when NPQ reached its maximum activity (Fig. 2A),  $F_v/F_m$  decreased to its minimum and no longer responded to increasing PFD (Fig. 2B). As  $qP$  decreased in response to increasing PFD or decreasing leaf N (Fig. 2C), PSII quantum efficiency was reduced (Fig. 1C). Therefore, it is both non-photochemical and photochemical quenching that determine PSII quantum efficiency (Genty *et al.*, 1989).

The quantitative relationship between PSII efficiency and CO<sub>2</sub> assimilation obtained under non-photorespiratory conditions served as a calibration curve in this study. This curve was used to estimate the rate of non-cyclic electron transport associated with Rubisco and its partitioning between CO<sub>2</sub> assimilation and photorespiration under photorespiratory conditions. It was assumed that alternative electron sinks accounted for the same proportion of total non-cyclic electron transport under both photorespiratory and non-photorespiratory conditions. Both the rate of non-cyclic electron flow associated with Rubisco and the rate of electron flow to CO<sub>2</sub> and to O<sub>2</sub> increased with increasing leaf N at any given C<sub>i</sub>. However, the percentage of non-cyclic electron flow to CO<sub>2</sub> assimilation remained the same regardless

of leaf N content. This indicates that electron partitioning between CO<sub>2</sub> assimilation and photorespiration is not affected by leaf N content. For a given C<sub>i</sub>, apple leaves with different N contents may be operating at a similar CO<sub>2</sub> concentration at the carboxylation site of Rubisco. This is because the ratio of carboxylation to oxygenation is mainly determined by the actual concentrations of CO<sub>2</sub> and O<sub>2</sub> within the chloroplasts at a given temperature and atmospheric pressure (Brooks and Farquhar, 1985; Jordan and Ogren, 1984).

The partitioning of non-cyclic electron flow between CO<sub>2</sub> assimilation and photorespiration in response to C<sub>i</sub> in apple leaves found in this study is consistent with the result obtained by measuring <sup>18</sup>O<sub>2</sub> uptake and net <sup>16</sup>O<sub>2</sub> evolution in leaves of C<sub>3</sub> plants (Badger, 1985; Canvin *et al.*, 1980; Gerbaud and Andre, 1980). In those studies, a decrease in O<sub>2</sub> uptake at low CO<sub>2</sub> concentrations was reported. It is interesting that in this study electron flow to O<sub>2</sub> decreased when C<sub>i</sub> dropped below about 100 μmol mol<sup>-1</sup> in medium to high-N leaves, but not in low N-leaves. This decrease could be caused by deactivation of Rubisco at low CO<sub>2</sub> concentrations (Badger, 1985). Indeed, Rubisco activation state falls substantially when C<sub>i</sub> drops below 100 μmol mol<sup>-1</sup> (Sage *et al.*, 1990; von Caemmerer and Edmondson, 1986). The differential response of non-cyclic electron flow to O<sub>2</sub> at low C<sub>i</sub> in apple leaves with different N contents in this study could have been caused by the difference in the amount of active Rubisco. In low-N leaves, the amount of Rubisco is very limited, and all the Rubisco is active at ambient CO<sub>2</sub> (Cheng and Fuchigami, 2000). When C<sub>i</sub> decreases to below 100 μmol mol<sup>-1</sup>, the amount of CO<sub>2</sub> may be adequate to keep all the Rubisco activated in low-N leaves. In contrast, the same low C<sub>i</sub> may activate only a percentage of the Rubisco in medium to high-N leaves.

## Acknowledgements

The authors thank Dr J Andrews for reading the manuscript and Priscilla Licht for editorial assistance.

## References

- Badger MR. 1985. Photosynthetic oxygen exchange. *Annual Review of Plant Physiology* **36**, 27–53.
- Bilger W, Björkman O. 1990. Role of the xanthophyll cycle in photoprotection elucidated by measurements of light-induced absorbance changes, fluorescence and photosynthesis in *Hedera canariensis*. *Photosynthesis Research* **25**, 173–185.
- Brooks A, Farquhar GD. 1985. Effect of temperature on the CO<sub>2</sub>/O<sub>2</sub> specificity of ribulose-1,5-bisphosphate carboxylase/oxygenase and the rate of dark respiration in the light. *Planta* **165**, 397–406.
- Canvin DT, Berry JA, Badger MR, Fock H, Osmond CB. 1980. Oxygen exchange in leaves in the light. *Plant Physiology* **66**, 302–307.
- Cheng L, Fuchigami LH. 2000. Rubisco activation state decreases with increasing nitrogen content in apple leaves. *Journal of Experimental Botany* **51**, 1687–1694.
- Cheng L, Fuchigami LH, Breen PJ. 2000. Light absorption and partitioning in relation to nitrogen content in 'Fuji' apple leaves. *Journal of American Society for Horticultural Science* **125**, 581–587.
- Cornic G, Briantais JM. 1991. Partitioning of photosynthetic electron flow between CO<sub>2</sub> and O<sub>2</sub> reduction in a C<sub>3</sub> leaf (*Phaseolus vulgaris* L.) at different CO<sub>2</sub> concentrations and during drought stress. *Planta* **183**, 178–184.
- Cornic G, Ghashghaie J. 1991. Effect of temperature on net CO<sub>2</sub> assimilation and photosystem II quantum yield of electron transfer of French bean (*Phaseolus vulgaris* L.) leaves during drought stress. *Planta* **185**, 255–260.
- Evans JR. 1987. The dependence of quantum yield on wavelength and growth irradiance. *Australian Journal of Plant Physiology* **14**, 69–79.
- Genty B, Briantais JM, Baker NR. 1989. The relationship between the quantum yield of photosynthetic electron transport and quenching of chlorophyll fluorescence. *Biochimica et Biophysica Acta* **990**, 87–92.
- Genty B, Goulas Y, Dimon B, Peltier G, Briantais JM, Moya I. 1992. Modulation of efficiency of primary conversion in leaves, mechanisms involved at PS2. In: Murata N, ed. *Research in photosynthesis*, Vol. IV. The Netherlands: Kluwer Academic Publishers, 603–610.
- Gerbaud A, Andre M. 1980. Effect of CO<sub>2</sub>, O<sub>2</sub> and light on photosynthesis and photorespiration in wheat. *Plant Physiology* **66**, 1032–1036.
- Ghashghaie J, Cornic G. 1994. Effects of temperature on partitioning of photosynthetic electron flow between CO<sub>2</sub> assimilation and O<sub>2</sub> reduction and on the CO<sub>2</sub>/O<sub>2</sub> specificity of Rubisco. *Journal of Plant Physiology* **143**, 643–650.
- Habash DZ, Paul MJ, Parry MAJ, Keys AJ, Lawlor DW. 1995. Increased capacity for photosynthesis in wheat grown at elevated CO<sub>2</sub>: the relationship between electron transport and carbon metabolism. *Planta* **197**, 482–489.
- Harbinson J, Genty B, Baker NR. 1990. The relationship between CO<sub>2</sub> assimilation and electron transport in leaves. *Photosynthesis Research* **25**, 213–224.
- Hormann H, Neubauer C, Schreiber U. 1994. On the relationship between chlorophyll fluorescence quenching and the quantum yield of electron transport in isolated thylakoids. *Photosynthesis Research* **40**, 93–106.
- Jordan DB, Ogren WL. 1984. The CO<sub>2</sub>/O<sub>2</sub> specificity of ribulose 1,5-bisphosphate carboxylase/oxygenase. Dependence on ribulose bisphosphate concentration, pH and temperature. *Planta* **161**, 308–313.
- Keiller DR, Walker DA. 1990. The use of chlorophyll fluorescence to predict CO<sub>2</sub> fixation during photosynthetic oscillations. *Proceedings of the Royal Society of London B241*, 59–64.
- Khamis S, Lamaze T, Lemoine Y, Foyer C. 1990. Adaptation of the photosynthetic apparatus in maize leaves as a result of nitrogen limitation: relationship between electron transport and carbon assimilation. *Plant Physiology* **94**, 1436–1443.
- Krall JP, Edwards GE. 1990. Quantum yields of photosystem II electron transport and carbon dioxide fixation in C<sub>4</sub> plants. *Australian Journal of Plant Physiology* **17**, 579–588.
- Krall JP, Edwards GE. 1991. Environmental effects on the relationship between the quantum yields of carbon assimilation and *in vivo* PSII electron transport in maize. *Australian Journal of Plant Physiology* **18**, 267–278.
- Krall JP, Edwards GE, Ku MSB. 1991. Quantum yield of photosystem II and efficiency of CO<sub>2</sub> fixation in *Flaveria*

- (Asteraceae) species under varying light and CO<sub>2</sub>. *Australian Journal of Plant Physiology* **18**, 369–383.
- Lee HJ, Titus JS.** 1992. Nitrogen accumulation and nitrate reductase activity in MM. 106 apple trees as affected by nitrate supply. *Journal of Horticultural Science* **67**, 273–281.
- Maxwell K, Badger MR, Osmond CB.** 1998. A comparison of CO<sub>2</sub> and O<sub>2</sub> exchange patterns and the relationship with chlorophyll fluorescence during photosynthesis in C<sub>3</sub> and CAM plants. *Australian Journal of Plant Physiology* **25**, 45–52.
- Oberhuber W, Dai ZY, Edwards GE.** 1993. Light dependence of quantum yields of photosystem II and CO<sub>2</sub> fixation in C<sub>3</sub> and C<sub>4</sub> plants. *Photosynthesis Research* **35**, 265–274.
- Öquist G, Chow WS.** 1992. On the relationship between the quantum yield of photosystem II electron transport, as determined by chlorophyll fluorescence and the quantum yield of CO<sub>2</sub>-dependent O<sub>2</sub> evolution. *Photosynthesis Research* **33**, 51–62.
- Sage RF, Sharkey TD, Seemann JR.** 1990. Regulation of ribulose-1,5-bisphosphate carboxylase activity in response to light intensity and CO<sub>2</sub> in the C<sub>3</sub> annuals *Chenopodium album* L. and *Phaseolus vulgaris* L. *Plant Physiology* **94**, 1735–1742.
- Seaton GGR, Walker DA.** 1990. Chlorophyll fluorescence as a measure of photosynthetic carbon assimilation. *Proceedings of the Royal Society of London* **B242**, 29–35.
- Schreiber U, Hormann H, Neubauer C, Klughammer C.** 1995. Assessment of photosystem II photochemical quantum yield by chlorophyll fluorescence quenching analysis. *Australian Journal of Plant Physiology* **22**, 209–220.
- Schuman GE, Stanley AM, Knudsen D.** 1973. Automated total nitrogen analysis of soil and plant samples. *Proceedings of Soil Science Society of America* **37**, 480–481.
- von Caemmerer S, Edmondson DL.** 1986. Relationship between steady-state gas exchange, *in vivo* ribulose bisphosphate carboxylase activity and some carbon reduction cycle intermediates in *Raphanus sativus*. *Australian Journal of Plant Physiology* **13**, 669–688.
